# Supplementary material for: A high throughput, functional screen of human Body Mass Index GWAS loci using tissue-specific RNAi Drosophila melanogaster crosses
Source: PLoS Genet. 2018 Apr 2;14(4):e1007222. doi: 10.1371/journal.pgen.1007222 (PMC5897035; doi:10.1371/journal.pgen.1007222)
Supplement: S1 Table — (XLSX) [file pgen.1007222.s001.xlsx]

## Sheet: 78 SNPs from Speliotes & Locke
_gene	GeneID	chrom	start_position	end_position	gene size	origin	i	index	BMIsnp	BMIloc	snp in target	T_Fly_Symbol	T_CGNumber	T_VDRC	T_Droschr	Fly_Symbol	CG Number	VDRC line	bmi	Adult weights	Adult % body fat	Weights average	Weights SEM	% body fat average	% body fat SEM			1
BCDIN3D	144233	12	50229825	50236911	7086	target	55	1	rs7138803	50247468	11kb away					CG11342	CG11342	--------	4e-11	--------	--------	----------	----------	----------	----------			1
INO80E	283899	16	30007484	30017111	9627	target	70	1	rs4787491	29922838	intron					CG18004	CG18004	----------	0.0011	----------	----------	----------	----------	----------	----------			0
DYNC1I1	1780	7	95401817	95739633	337816	right	38	3								Sdic4	CG33499	----------	0.00095	----------	----------	----------	----------	----------	----------			0
SLX1A	548593	16	30205163	30208886	3723	right	70	3								slx1	CG18271	----------		----------	----------	----------	----------	----------	----------			0
SLC35F6	54978	2	26987130	27004098	16968	right	12	3								Tango9	CG10007	----------	0.014	----------	----------	----------	----------	----------	----------			1
AGBL4	84871	1	48998526	50489625	1491099	target	2	1	rs657452	49362434						CG31019	CG31019	-------------	2.6e-05	-------------	-------------	----------	----------	----------	----------			0
SAE1	10055	19	47634079	47713892	79813	right	86	3				Aos1	CG12276	47256	2	Aos1	CG12276	47256	5.6e-05	bigger	fatter	0.83	0.01					0
CHST8	64377	19	34112860	34264413	151553	left	83	2				CG13937	CG13937	3373	3	CG13937	CG13937	3373	0.00023	bigger	leaner	0.82	0.01	0.725	0.075			0
GLDN	342035	15	51633712	51700209	66497	left	61	2				CG6867	CG6867	37416	3	CG6867	CG6867	37416	0.0012	bigger	WT	0.83	0.01	1.213	0.067			0
GIPC2	54810	1	78510645	78604128	93483	right	6	3				kermit	CG11546	109297	2	kermit	CG11546	109297	0.00015	bigger	WT	0.88	0.01	1.74	0.077			0
PDILT	204474	16	20370491	20416063	45572	right	67	3				Pdi	CG6988	23359	3	Pdi	CG6988	23359	0.00031	bigger	fatter	0.73	0.01	1.776	0.153			0
TAOK2	9344	16	29985187	30003582	18395	left	70	2				Tao	CG14217	107645	2	Tao	CG14217	107645	0.0013	bigger	WT	0.87	0.04	1.898	0.239			0
VKORC1	79001	16	31102174	31106698	4524	left	71	2				Vkor	CG33544	48807	3	Vkor	CG33544	48807	0.01	bigger	fatter	0.83	0.01	2.128	0.107			0
ALDOA	226	16	30064410	30081740	17330	right	70	3				Ald	CG6058	101339	2	Ald	CG6058	101339	0.0024	LETHAL	LETHAL	----------	----------	----------	----------			1
ATP2A1	487	16	28889191	28915829	26638	target	69	1	rs3888190	28796987	240 kb away	Ca-P60A	CG3725	107446	2	Ca-P60A	CG3725	107446	2.3e-10	LETHAL	LETHAL	----------	----------	----------	----------			0
RNF25	64320	2	219528586	219536780	8194	right	19	3				CG13344	CG13344	17141	2	CG13344	CG13344	17141	0.0018	LETHAL	LETHAL	----------	----------	----------	----------			0
OPA3	80207	19	46031024	46088121	57097	left	85	2				CG13601	CG13601	110752	2	CG13601	CG13601	110752	0.0013	LETHAL	LETHAL	----------	----------	----------	----------			0
PPP1R37	284352	19	45596430	45650542	54112	right	84	3				CG31635	CG31635	33980	3	CG31635	CG31635	33980	0.065	LETHAL	LETHAL	----------	----------	----------	----------			0
BOLA2B	654483	16	30204255	30205626	1371	right	70	3				CG33672	CG33672	49774	3	CG33672	CG33672	49774		LETHAL	LETHAL	----------	----------	----------	----------			0
CLPTM1	1209	19	45457841	45496603	38762	right	84	3				CG3702	CG3702	7296	1	CG3702	CG3702	7296	0.12	LETHAL	LETHAL	----------	----------	----------	----------			0
DHX33	56919	17	5344231	5372379	28148	right	75	3				CG4901	CG4901	34904	2	CG4901	CG4901	34904	0.00021	LETHAL	LETHAL	----------	----------	----------	----------			0
AAMP	14	2	219128851	219134892	6041	left	19	2				CG5114	CG5114	101450	2	CG5114	CG5114	101450	0.22	LETHAL	LETHAL	----------	----------	----------	----------			0
EIF3CL	728689	16	28390899	28415161	24262	right	68	3				eIF3-S8	CG4954	26664	2	eIF3-S8	CG4954	26664		LETHAL	LETHAL	----------	----------	----------	----------			0
NUP88	4927	17	5289345	5323399	34054	right	75	3				mbo	CG6819	47692	2	mbo	CG6819	47692	4.9e-05	LETHAL	LETHAL	----------	----------	----------	----------			0
SDAD1	55153	4	76871063	76912114	41051	left	26	2				Mys45A	CG8070	103574	2	Mys45A	CG8070	103574	0.074	LETHAL	LETHAL	----------	----------	----------	----------			0
ORAI3	93129	16	30960404	30966258	5854	left	71	2				olf186-F	CG11430	12221	2	olf186-F	CG11430	12221		LETHAL	LETHAL	----------	----------	----------	----------			0
PPP4C	5531	16	30087296	30096697	9401	right	70	3				Pp4-19C	CG32505	25317	2	Pp4-19C	CG32505	25317	0.0026	LETHAL	LETHAL	----------	----------	----------	----------			0
RPA1	6117	17	1733272	1802847	69575	left	74	2				RpA-70	CG9633	11210	3	RpA-70	CG9633	11210	0.0095	LETHAL	LETHAL	----------	----------	----------	----------			0
RPL27A	6157	11	8703994	8711418	7424	right	49	3				RpL27A	CG15442	101506	2	RpL27A	CG15442	101506	1.7e-06	LETHAL	LETHAL	----------	----------	----------	----------			0
UBA52	7311	19	18674575	18688269	13694	right	82	3				RpL40	CG2960	108730	2	RpL40	CG2960	108730	0.45	LETHAL	LETHAL	----------	----------	----------	----------			0
RPS10	6204	6	34385230	34393901	8671	left	31	2				RpS10b	CG14206	49843	2	RpS10b	CG14206	49843	4.1e-06	LETHAL	LETHAL	----------	----------	----------	----------			0
SNRPD2	6633	19	46190711	46195568	4857	left	85	2				SmD2	CG1249	100690	2	SmD2	CG1249	100690	0.053	LETHAL	LETHAL	----------	----------	----------	----------			0
SYMPK	8189	19	46318699	46366547	47848	right	85	3				Sym	CG2097	33470	3	Sym	CG2097	33470	0.035	LETHAL	LETHAL	----------	----------	----------	----------			0
STX1B	112755	16	31000576	31021828	21252	left	71	2				Syx1A	CG31136	33112	3	Syx1A	CG31136	33112	0.012	LETHAL	LETHAL	----------	----------	----------	----------			1
TOMM40	10452	19	45394476	45406945	12469	target	84	1	rs2075650	50087459	intron	Tom40	CG12157	13177	2	Tom40	CG12157	13177	0.0055	LETHAL	LETHAL	----------	----------	----------	----------			0
SMARCD1	6602	12	50478759	50494493	15734	right	55	3				Bap60	CG4303	103634	2	Bap60	CG4303	103634	0.099	PUPAL LETHAL	PUPAL LETHAL	----------	----------	----------	----------			0
TSR1	55720	17	2225971	2240677	14706	right	74	3				CG7338	CG7338	27965	2	CG7338	CG7338	27965	0.2	PUPAL LETHAL	PUPAL LETHAL	----------	----------	----------	----------			0
TUFM	7284	16	28853731	28857728	3997	left	69	2				EfTuM	CG6050	108065	2	EfTuM	CG6050	108065	2.7e-10	PUPAL LETHAL	PUPAL LETHAL	----------	----------	----------	----------			0
ERCC1	2067	19	45910590	45982240	71650	left	85	2				Ercc1	CG10215	110419	2	Ercc1	CG10215	110419	0.027	PUPAL LETHAL	PUPAL LETHAL	----------	----------	----------	----------			0
FOSB	2354	19	45971252	45978436	7184	left	85	2				kay	CG33956	6212	3	kay	CG33956	6212	0.039	PUPAL LETHAL	PUPAL LETHAL	----------	----------	----------	----------			0
NUP160	23279	11	47799669	47870056	70387	right	53	3				Nup160	CG4738	109318	2	Nup160	CG4738	109318	2.8e-10	PUPAL LETHAL	PUPAL LETHAL	----------	----------	----------	----------			0
NOVA2	4858	19	46442770	46476656	33886	right	85	3				ps	CG42670	108666	2	ps	CG42670	108666	0.00012	PUPAL LETHAL	PUPAL LETHAL	----------	----------	----------	----------			0
SEC31B	25956	10	102246396	102279710	33314	left	46	2				sec31	CG8266	35868	2	sec31	CG8266	35868	0.043	PUPAL LETHAL	PUPAL LETHAL	----------	----------	----------	----------			0
AP2S1	1175	19	47341422	47354202	12780	left	86	2				AP-2sigma	CG6056	110725	2	AP-2sigma	CG6056	110725	0.21	smaller	fatter	0.66	0.01	2.308	0.189			0
NUDT3	11165	6	34254970	34360456	105486	left	31	2				Aps	CG6391	110607	2	Aps	CG6391	110607	4.6e-06	smaller	fatter	0.75	0.01	2.294	0.387			0
CELF1	10658	11	47487488	47574791	87303	left	53	2				aret	CG31762	107459	2	aret	CG31762	107459	5.8e-11	smaller	leaner	0.75	0.02	0.928	0.189			0
ARIH1	25820	15	72766666	72878903	112237	left	63	2				ari-1	CG5659	39591	1	ari-1	CG5659	*39591	0.24	smaller	fatter	1.31	0.03	3.37	0.285			0
ARPC2	10109	2	219081816	219119070	37254	left	19	2				Arpc2	CG10954	104396	2	Arpc2	CG10954	104396	0.012	smaller	WT	0.8	0.01	1.209	0.125			0
BBS4	585	15	72978519	73030816	52297	left	63	2				BBS4	CG13232	100571	2	BBS4	CG13232	100571	0.0014	smaller	WT	0.77	0.01	1.178	0.099			0
TMBIM6	7009	12	50135292	50158716	23424	left	55	2				BI-1	CG7188	110358	2	BI-1	CG7188	110358	3.4e-06	smaller	WT	0.68	0.01	1.333	0.043			1
SLC39A8	64116	4	103172197	103266654	94457	target	27	1	rs13107325	103188709	missense	CG10006	CG10006	101031	2	CG10006	CG10006	101031	1.4e-07	smaller	WT	0.75	0.02	1.237	0.108			1
KCTD15	79047	19	34287750	34306665	18915	target	83	1	rs29941	34309532	3 kb away	CG10440	CG10440	107922	2	CG10440	CG10440	107922	1.3e-09	smaller	WT	0.78	0.01	1.891	0.363			0
DRC1	92749	2	26624783	26679578	54795	left	12	2				CG10958	CG10958	108726	2	CG10958	CG10958	108726	0.067	smaller	fatter	0.74	0.02	1.896	0.176			0
IRF2BP1	26145	19	46386865	46389375	2510	right	85	3				CG11138	CG11138	101998	2	CG11138	CG11138	101998	0.38	smaller	WT	0.77	0.02	1.641	0.177			0
DPH1	1801	17	1933430	1947182	13752	left	74	2				CG11652	CG11652	103550	2	CG11652	CG11652	103550	0.28	smaller	WT	0.7	0.04	1.153	0.168			0
NDUFS3	4722	11	47600561	47606114	5553	left	53	2				CG12079	CG12079	103412	2	CG12079	CG12079	103412	0.56	smaller	WT	0.81	0.01	1.576	0.106			0
FAM73A	374986	1	78245308	78345224	99916	left	6	2				CG12125	CG12125	110737	2	CG12125	CG12125	110737	4.1e-05	smaller	WT	0.77	0.01	1.733	0.08			1
HSD17B12	51144	11	43702107	43878168	176061	target	52	1	rs2176598	43820854	intron	CG1444	CG1444	110678	2	CG1444	CG1444	110678	0.0021	smaller	fatter	0.79	0.03	2.497	0.24			0
PACRG	135138	6	163148163	163736523	588360	right	35	3				CG15120	CG15120	107946	2	CG15120	CG15120	107946	4.4e-05	smaller	WT	0.71	0.02	1.402	0.313			0
YPEL3	83719	16	30103634	30108247	4613	right	70	3				CG15309	CG15309	101370	2	CG15309	CG15309	101370	0.95	smaller	fatter	0.78	0.01	2.519	0.315			0
TTLL4	9654	2	219575557	219620138	44581	right	19	3				CG16833	CG16833	110676	2	CG16833	CG16833	110676	0.00035	smaller	fatter	0.78	0.01	2.073	0.338			0
SGSM2	9905	17	2240805	2284352	43547	right	74	3				CG1695	CG1695	106947	2	CG1695	CG1695	106947	0.077	smaller	fatter	0.72	0.01	2.935	0.262			0
TIMM17A	10440	1	201924618	201939788	15170	right	9	3				CG1724	CG1724	30317	2	CG1724	CG1724	30317	0.066	smaller	leaner	0.73	0.01	0.74	0.097			0
RIOK3	8780	18	21032786	21063103	30317	left	77	2				CG3008	CG3008	103828	2	CG3008	CG3008	103828	0.029	smaller	WT	0.8	0.01	1.141	0.134			0
RSPH6A	81492	19	46298967	46318604	19637	right	85	3				CG3121	CG3121	106848	2	CG3121	CG3121	106848	0.12	smaller	WT	0.76	0.02	2.067	0.185			1
LMX1B	4010	9	129376721	129463310	86589	target	44	1	rs10733682	128500735	3' UTR	CG32105	CG32105	108747	2	CG32105	CG32105	108747	2.2e-06	smaller	WT	0.79	0.02	1.135	0.225			0
FMNL3	91010	12	50031723	50101196	69473	left	55	2				CG32138	CG32138	110438	2	CG32138	CG32138	110438	0.036	smaller	WT	0.76	0.01	1.151	0.222			0
MPV17L2	84769	19	18303985	18307551	3566	left	82	2				CG32262	CG32262	108921	2	CG32262	CG32262	108921	0.056	smaller	WT	0.75	0.01	1.082	0.168			0
ARMC2	84071	6	109169616	109295351	125735	right	33	3				CG32668	CG32668	103633	2	CG32668	CG32668	103633	0.034	smaller	WT	0.8	0.02	1.638	0.185			1
GBE1	2632	3	81538849	81810949	272100	target	22	1	rs3849570	81874802	intron	CG33138	CG33138	108087	2	CG33138	CG33138	108087	0.00019	smaller	WT	0.76	0.02	1.371	0.104			0
UHRF1BP1	54887	6	34759793	34845290	85497	right	31	3				CG34126	CG34126	107307	2	CG34126	CG34126	107307	0.00087	smaller	leaner	0.8	0.01	1.021	0.179			1
RALYL	138046	8	85095452	85834078	738626	target	40	1	rs2033732	85242264	15 kb 5' away	CG42458	CG42458	108072	2	CG42458	CG42458	108072	3.8e-06	smaller	fatter	0.73	0.01	2.553	0.341			0
BCS1L	617	2	219524378	219528165	3787	right	19	3				CG4908	CG4908	110810	2	CG4908	CG4908	110810	0.0023	smaller	WT	0.62	0.02	1.114	0.074			0
CCDC132	55610	7	92861652	92990434	128782	left	37	2				CG4996	CG4996	108290	2	CG4996	CG4996	108290	0.07	smaller	WT	0.75	0.01	1.317	0.135			1
C6orf106	64771	6	34555064	34664624	109560	target	31	1	rs205262	34671142	intron	CG5445	CG5445	100682	2	CG5445	CG5445	100682	0.00013	smaller	leaner	0.75	0.01	1.048	0.103			0
FKBP8	23770	19	18642567	18654886	12319	right	82	3				CG5482	CG5482	110620	2	CG5482	CG5482	110620	0.093	smaller	WT	0.82	0.2	1.641	0.181			0
CTDSP1	58190	2	219263060	219270663	7603	left	19	2				CG5830	CG5830	101539	2	CG5830	CG5830	101539	0.00019	smaller	WT	0.79	0.02	1.227	0.311			0
RSRC2	65117	12	122989189	123011559	22370	right	56	3				CG6340	CG6340	110114	2	CG6340	CG6340	110114	0.0073	smaller	fatter	0.79	0.01	2.754	0.195			0
DMWD	1762	19	46286204	46296059	9855	right	85	3				CG6420	CG6420	110609	2	CG6420	CG6420	110609	0.48	smaller	WT	0.78	0.01	1.599	0.097			0
MAST3	23031	19	18208584	18262501	53917	left	82	2				CG6498	CG6498	109282	2	CG6498	CG6498	109282	0.052	smaller	WT	0.78	0.01	1.563	0.129			0
ADPGK	83440	15	73043707	73076125	32418	left	63	2				CG6650	CG6650	108004	2	CG6650	CG6650	108004	0.0011	smaller	WT	0.77	0.01	1.369	0.142			0
NUPR1	26471	16	28548661	28550494	1833	right	68	3				CG6770	CG6770	102402	2	CG6770	CG3770	102402	1.4e-07	smaller	leaner	0.78	0.01	1.035	0.142			0
HSD3B7	80270	16	30995948	31000472	4524	left	71	2				CG7724	CG7724	105609	2	CG7724	CG7724	105609	0.092	smaller	leaner	0.8	0.02	0.927	0.099			0
PSIP1	11168	9	15464063	15511002	46939	left	41	2				CG7946	CG7946	100307	2	CG7946	CG7946	100307	0.052	smaller	leaner	0.75	0.01	0.844	0.238			0
SRR	63826	17	2207243	2228552	21309	right	74	3				CG8129	CG8129	110407	2	CG8129	CG8129	110407	0.0037	smaller	fatter	0.75	0.02	3.182	0.428			0
C16orf62	57020	16	19566736	19712484	145748	left	66	2				CG8202	CG8202	105632	2	CG8202	CG8202	105632	3.1e-06	smaller	WT	0.78	0.01	1.662	0.1			1
C18orf8	29919	18	21083433	21113310	29877	target	77	1	rs1808579	19358886	intron	CG8270	CG8270	106201	2	CG8270	CG8270	106201	0.00045	smaller	WT	0.78	0.02	1.896	0.196			0
LACE1	246269	6	108616097	108846750	230653	left	33	2				CG8520	CG8520	108311	2	CG8520	CG8520	108311	0.02	smaller	fatter	0.76	0.01	1.991	0.164			0
ZNF296	162979	19	45574757	45579687	4930	right	84	3				CG9650	CG9650	104402	2	CG9650	CG9650	104402		smaller	WT	0.78	0.01	1.256	0.057			0
IFI30	10437	19	18284589	18288933	4344	left	82	2				CG9796	CG9796	103038	2	CG9796	CG9796	103038	0.058	smaller	WT	0.8	0.01	1.465	0.17			0
HIGD2B	123346	15	72968122	72978489	10367	left	63	2				CG9921	CG9921	110744	2	CG9921	CG9921	110744	0.062	smaller	leaner	0.58	0.01	0.592	0.127			0
SKOR1	390598	15	68112041	68126497	14456	right	62	3				CORL	CG11093	103367	2	CORL	CG11093	103367	1.6e-10	smaller	WT	0.79	0.01	1.208	0.135			0
CORO1A	11151	16	30194730	30200396	5666	right	70	3				coro	CG9446	109644	2	coro	CG9446	109644	0.0036	smaller	fatter	0.78	0.02	2.166	0.259			0
DPYSL5	56896	2	27070968	27173218	102250	right	12	3				CRMP	CG1411	101510	2	CRMP	CG1411	101510	0.0099	smaller	WT	0.78	0.01	1.417	0.174			0
CYP4X1	260293	1	47427035	47516422	89387	left	1	2				Cyp4d1	CG3656	109341	2	Cyp4d1	CG3656	109341	0.064	smaller	WT	0.78	0.004	1.212	0.4			0
CYP4A22	284541	1	47603106	47614527	11421	left	1	2				Cyp4s3	CG9081	38218	2	Cyp4s3	CG9081	38218	0.021	smaller	leaner	0.7	0.01	0.496	0.113			0
CMPK1	51727	1	47799468	47844510	45042	right	1	3				Dak1	CG6092	44164	3	Dak1	CG6092	44164	0.089	smaller	fatter	0.65	0.03	2.047	0.324			0
EML2	24139	19	46112657	46148774	36117	left	85	2				DCX-EMAP	CG42247	108417	2	DCX-EMAP	CG42247	108417	0.0025	smaller	WT	0.72	0.02	1.262	0.178			0
DERL2	51009	17	5377581	5389519	11938	right	75	3				Der-2	CG14899	108440	2	Der-2	CG14899	108440	8.1e-05	smaller	leaner	0.8	0.01	0.719	0.107			0
DGKG	1608	3	185852895	186080022	227127	right	25	3				Dgk	CG34361	105753	2	Dgk	CG34361	105753	2.2e-08	smaller	WT	0.75	0.01	1.215	0.09			1
CALCR	799	7	93053798	93204041	150243	target	37	1	rs9641123	93035668	intron	Dh31-R1	CG32843	101995	2	Dh31-R1	CG32843	101995	0.0075	smaller	WT	0.78	0.01	1.606	0.189			0
RELB	5971	19	45504706	45541455	36749	right	84	3				dl	CG6667	105491	2	dl	CG6667	105491	0.12	smaller	leaner	0.69	0.02	0.995	0.136			0
DNAJB4	11080	1	78444846	78483647	38801	left	6	2			intron	DnaJ-1	CG10578	104618	2	DnaJ-1	CG10578	104618	4.5e-05	smaller	WT	0.78	0.01	1.291	0.126			0
PDE4C	5143	19	18318770	18359009	40239	left	82	2				dnc	CG32498	107967	2	dnc	CG32498	107967	0.0062	smaller	WT	0.8	0.02	1.54	0.12			0
TBX6	6911	16	30097113	30103257	6144	right	70	3				Doc3	CG5093	104922	2	Doc3	CG5093	104922	0.0032	smaller	WT	0.7	0.02	1.059	0.35			1
ERBB4	2066	2	212240441	213403878	1163437	target	18	1	rs7599312	213121476	10 kb 5'	Egfr	CG10079	107130	2	Egfr	CG10079	107130	7.4e-05	smaller	fatter	0.7	0.01	3.457	0.375			1
EHBP1	23301	2	62900985	63273621	372636	target	15	1	rs11688816	62906552	intron	Ehbp1	CG15609	109413	2	Ehbp1	CG15609	109413	0.00049	smaller	WT	0.75	0.02	1.284	0.192			0
VASP	7408	19	46010687	46030246	19559	left	85	2				ena	CG15112	106484	2	ena	CG15112	106484	0.092	smaller	fatter	0.72	0.01	2.425	0.152			0
SPDEF	25803	6	34505578	34524109	18531	left	31	2				Ets98B	CG5583	107292	2	Ets98B	CG5583	107292	0.0038	smaller	fatter	0.78	0.01	3.607	0.266			0
XPO6	23214	16	28109296	28223280	113984	left	68	2				Exp6	CG3923	34737	3	Exp6	CG3923	34737	0.013	smaller	leaner	0.7	0.01	0.829	0.238			0
FOXD2	2306	1	47901688	47906362	4674	right	1	3				fd59A	CG3668	110516	2	fd59A	CG3668	110516	0.069	smaller	fatter	0.78	0.03	2.758	0.23			1
ELAVL4	1996	1	50513685	50669441	155756	target	3	1	rs11583200	50332407	intron	fne	CG4396	108902	2	fne	CG4396	108902	2.1e-05	smaller	fatter	0.78	0.01	2.594	0.334			1
RASA2	5922	3	141205890	141334185	128295	target	24	1	rs16851483	142758126	intron	Gap1	CG6721	105383	2	Gap1	CG6721	105383	1.1e-06	smaller	WT	0.8	0.01	1.354	0.135			0
DMPK	1760	19	46272974	46285814	12840	right	85	3				gek	CG4012	107207	2	gek	CG4012	107207	0.099	smaller	WT	0.7	0.02	1.842	0.331			1
QPCTL	54814	19	46195740	46207247	11507	target	85	1	rs2287019	46202172	intron	isoQC	CG5976	108983	2	isoQC	CG5976	108983	3.2e-07	smaller	WT	0.75	0.02	1.908	0.152			1
NEGR1	257194	1	71868624	72748532	879908	target	4	1	rs2815752	72812440	64 kb 5'	Lac	CG12369	107450	2	Lac	CG12369	107450	1.2e-14	Smaller	WT	0.75	0.01	1.338	0.363			0
SH2B1	25970	16	28872938	28885533	12595	left	69	2				Lnk	CG17367	103646	2	Lnk	CG17367	103646	1.8e-10	smaller	WT	0.77	0.01	1.152	0.221			1
LRP1B	53353	2	140988995	142889269	1900274	target	16	1	rs2890652	142959931	70 kb away	LRP1	CG33087	109605	2	LRP1	CG33087	109605	2.4e-07	smaller	WT	0.79	0.01	1.533	0.13			0
KLF7	8609	2	207938860	208031969	93109	left	17	2				luna	CG33473	102196	2	luna	CG33473	102196	0.00071	smaller	WT	0.77	0.02	1.571	0.356			0
OTOF	9381	2	26680070	26781565	101495	left	12	2				mfr	CG5747	103726	2	mfr	CG5747	103726	0.016	smaller	WT	0.78	0.01	1.28	0.206			1
KAT8	84148	16	31128984	31142713	13729	target	71	1	rs9925964	31037396	intron	mof	CG3025	105370	2	mof	CG3025	105370	0.0077	smaller	fatter	0.77	0.01	2.074	0.145			1
MTCH2	23788	11	47638857	47664205	25348	target	53	1	rs3817334	47650993	intron	Mtch	CG6851	106996	2	Mtch	CG6851	106996	4.8e-11	smaller	WT	0.74	0.02	1.366	0.233			1
FHIT	2272	3	59735035	61237132	1502097	target	21	1	rs2365389	61211502	intron	NitFhit	CG7067	108545	2	NitFhit	CG7067	108545	5.3e-06	smaller	WT	0.75	0.01	1.695	0.414			0
NANOS2	339345	19	46416471	46418035	1564	right	85	3				nos	CG6713	108433	2	nos	CG6713	108433	0.01	smaller	WT	0.71	0.01	1.529	0.23			0
NPC1	4864	18	21086147	21166580	80433	left	77	2				Npc1a	CG5722	105405	2	Npc1a	CG5722	105405	0.00036	smaller	leaner	0.79	0.01	0.794	0.157			1
NRXN3	9369	14	78636715	80334632	1697917	target	60	1	rs10150332	79936964	intron	Nrx-1	CG7050	4306	2	Nrx-1	CG7050	4306	2e-07	smaller	fatter	0.72	0.01	3.074	0.263			0
NUP54	53371	4	77035811	77069667	33856	left	26	2				Nup54	CG8831	103724	2	Nup54	CG8831	103724	0.37	smaller	leaner	0.8	0.02	0.832	0.071			0
C1QBP	708	17	5336098	5342470	6372	right	75	3				P32	CG6459	110239	2	P32	CG6459	110239	0.016	smaller	WT	0.78	0.01	1.404	0.175			0
PAGR1	79447	16	29827527	29833815	6288	left	70	2				Pa1	CG11750	101952	2	Pa1	CG11750	101952	0.28	smaller	fatter	0.79	0.02	2.496	0.253			1
TCF7L2	6934	10	114709977	114927436	217459	target	48	1	rs7903146	114748339	intron	pan	CG34403	108679	2	pan	CG34403	108679	0.00024	smaller	fatter	0.75	0.02	2.193	0.163			1
PARK2	5071	6	161768589	163148833	1380244	target	35	1	rs13191362	162953340	intron	park	CG10523	104363	2	park	CG10523	104363	2.9e-05	smaller	fatter	0.75	0.02	2.364	0.132			0
PDK4	5166	7	95212808	95225924	13116	right	38	3				Pdk	CG8808	106641	2	Pdk	CG8808	106641	0.019	smaller	fatter	0.77	0.03	2.627	0.306			0
PIK3R2	5296	19	18263987	18281342	17355	left	82	2				Pi3K21B	CG2699	104179	2	Pi3K21B	CG2699	104179	0.14	smaller	WT	0.76	0.01	1.271	0.093			0
CDIPT	10423	16	29869677	29874800	5123	left	70	2				Pis	CG9245	106842	2	Pis	CG9245	106842	0.37	smaller	WT	0.79	0.02	1.246	0.377			0
PTPMT1	114971	11	47586887	47595012	8125	left	53	2				Plip	CG10371	104774	2	Plip	CG10371	104774	0.61	smaller	fatter	0.73	0.02	2.163	0.244			0
ETS2	2114	21	40177230	40196878	19648	left	87	2				pnt	CG17077	105390	2	pnt	CG17077	105390	0.044	smaller	WT	0.8	0.01					0
RAB3A	5864	19	18307608	18314873	7265	left	82	2				Rab3	CG7576	100787	2	Rab3	CG7576	100787	0.0049	smaller	WT	0.79	0.01	1.666	0.162			0
IPO9	55705	1	201798287	201853421	55134	right	9	3				Ranbp9	CG5252	110236	2	Ranbp9	CG5252	110236	2.6e-05	smaller	WT	0.69	0.01	1.204	0.239			1
DMXL2	23312	15	51739920	51915029	175109	target	61	1	rs3736485	49535902	intron	Rbcn-3A	CG3585	108547	2	Rbcn-3A	CG3585	108547	5.4e-05	smaller	WT	0.71	0.02	1.275	0.201			0
RQCD1	9125	2	219433302	219461157	27855	right	19	3				Rcd-1	CG14213	101462	2	Rcd-1	CG14213	101462	0.0015	smaller	WT	0.75	0.01	1.684	0.109			0
NFKB1	4790	4	103422485	103538458	115973	right	27	3				Rel	CG11992	108469	2	Rel	CG11992	108469	3.7e-05	smaller	WT	0.74	0.02	1.829	0.175			0
ARHGAP35	2909	19	47421823	47508333	86510	left	86	2				RhoGAPp190	CG32555	110213	2	RhoGAPp190	CG32555	110213	0.064	smaller	WT	0.8	0.02	1.495	0.16			0
RPAIN	84268	17	5322960	5336339	13379	right	75	3				Ripalpha	CG18145	105563	2	Ripalpha	CG18145	105563	0.00041	smaller	WT	0.73	0.03	0.932	0.285			0
LGR4	55366	11	27387507	27494337	106830	left	50	2				rk	CG8930	105360	2	rk	CG8930	105360	1.9e-06	smaller	WT	0.79	0.01	1.674	0.17			0
DOC2A	8448	16	30016834	30023423	6589	right	70	3				Rph	CG11556	109337	2	Rph	CG11556	109337	0.0032	smaller	WT	0.78	0.02	1.66	0.445			0
RTN2	6253	19	45988545	46000312	11767	left	85	2				Rtnl1	CG33113	110545	2	Rtnl1	CG33113	110545	0.021	smaller	leaner	0.8	0.01	0.919	0.115			1
SEC16B	89866	1	177892824	177939187	46363	target	8	1	rs543874	177889480	3 kb	Sec16	CG32654	109645	2	Sec16	CG32654	109645	1.7e-13	smaller	fatter	0.75	0.01	2.099	0.083			0
CCDC101	112869	16	28565248	28603110	37862	right	68	3				Sgf29	CG30390	101326	2	Sgf29	CG30390	101326	3e-08	smaller	WT	0.8	0.01	1.439	0.137			1
NAV1	89796	1	201508242	201796101	287859	target	9	1	rs2820292	200050910	intron	sick	CG42589	104551	2	sick	CG42589	104551	2.8e-05	smaller	WT	0.79	0.02	1.399	0.191			0
SIX5	147912	19	46268042	46272496	4454	right	85	3				Six4	CG3871	104958	2	Six4	CG3871	104958	0.32	smaller	fatter	0.75	0.01	2.29	0.25			1
SMG6	23293	17	1963132	2207068	243936	target	74	1	rs9914578	1951886	intron	Smg6	CG6369	106042	2	Smg6	CG6369	106042	0.0092	smaller	WT	0.79	0.01	1.785	0.592			0
SNRPC	6631	6	34724870	34741633	16763	right	31	3				snRNP-U1-C	CG5454	108933	2	snRNP-U1-C	CG5454	108933	0.00056	smaller	leaner	0.76	0.01	0.957	0.164			0
SPNS1	83985	16	28986027	28995868	9841	right	69	3				spin	CG8428	105462	2	spin	CG8428	105462	9.1e-07	smaller	leaner	0.8	0.01	1.04	0.185			0
PPP1R9A	55607	7	94536948	94925726	388778	left	38	2				Spn	CG16757	105888	2	Spn	CG16757	105888	0.022	smaller	WT	0.76	0.02	1.711	0.118			0
SSBP4	170463	19	18529678	18545371	15693	right	82	3				Ssdp	CG7187	102006	2	Ssdp	CG7187	102006	0.3	smaller	WT	0.76	0.01	1.618	0.118			0
BANK1	55024	4	102711763	102995968	284205	left	27	2				stumps	CG31317	105603	2	stumps	CG31317	105603	6.8e-06	smaller	fatter	0.72	0.02	2.471	0.183			0
ELL	8178	19	18553472	18632936	79464	right	82	3				Su(Tpl)	CG32217	105657	2	Su(Tpl)	CG32217	105657	0.038	smaller	fatter	0.76	0.02	2.367	0.222			0
PAX2	5076	10	102495315	102589697	94382	right	46	3				sv	CG11049	107343	2	sv	CG11049	107343	0.00036	smaller	fatter	0.81	0.09	2.049	0.096			1
RBM26	64062	13	79885961	79980392	94431	target	58	1	rs1441264	79580919	300 kb away	swm	CG10084	105950	2	swm	CG10084	105950	0.00015	smaller	leaner	0.73	0.01	0.854	0.135			0
PACSIN1	29993	6	34433837	34502999	69162	left	31	2				Synd	CG33094	104580	2	Synd	CG33094	104580	2.8e-06	smaller	WT	0.71	0.01	1.918	0.173			1
KCNK3	3777	2	26915580	26954065	38485	target	12	1	rs11126666	26782315	intron	Task7	CG9361	106135	2	Task7	CG9361	106135	0.00073	smaller	WT	0.73	0.03	0.95	0.34			0
PSMC3	5702	11	47440319	47448023	7704	left	53	2				Tbp-1	CG10370	105133	2	Tbp-1	CG10370	105133	6.9e-08	smaller	WT	0.72	0.02	1.12	0.21			0
NPAS1	4861	19	47523076	47549032	25956	left	86	2				trh	CG42865	105109	2	trh	CG42865	105109	0.0029	smaller	fatter	0.81	0.01	2.058	0.409			0
CNNM2	54805	10	104678074	104838343	160269	left	47	2				uex	CG42595	103156	2	uex	CG42595	103156	3.5e-05	smaller	WT	0.77	0.02	1.154	0.111			0
VTI1A	143187	10	114206755	114578502	371747	left	48	2				Vti1	CG3279	45725	2	Vti1	CG3279	45725	0.018	smaller	fatter	0.73	0.02	2.11	0.183			0
KXD1	79036	19	18668571	18680196	11625	right	82	3				CG10681	CG10681	103781	2	CG10681	CG10681	103781	0.51	smaller	WT	0.74	0.02	1.505	0.229			0
ASPHD1	253982	16	29912146	29931180	19034	left	70	2				Asph	CG8421	101484	2	Asph	CG8421	101484	0.0089	WT	WT	0.82	0.02	1.579	0.146			0
ATXN2L	11273	16	28834368	28848557	14189	left	69	2				Atx2	CG5166	108843	2	Atx2	CG5166	108843	4.2e-10	WT	WT	0.84	0.01	1.541	0.18			0
BCL7C	9274	16	30845372	30905851	60479	left	71	2				BCL7-like	CG17252	106828	2	BCL7-like	CG17252	106828	0.15	WT	fatter	0.83	0.02	1.838	0.157			1
GPRC5B	51704	16	19870292	19897048	26756	target	66	1	rs12444979	19933600	32 kb away	boss	CG8285	4366	3	boss	CG8285	4366	4.2e-11	WT	WT	0.74	0.03	1.348	0.237			0
VPS33A	65082	12	122714110	122751067	36957	left	56	2				car	CG12230	110756	2	car	CG12230	110756	0.087	WT	fatter	0.85	0.02	2.718	0.386			0
FUS	2521	16	31191430	31206191	14761	right	71	3				caz	CG3606	100291	2	caz	CG3606	100291	0.13	WT	leaner	0.81	0.02	1	0.156			0
CBLC	23624	19	45281125	45303902	22777	left	84	2				Cbl	CG7037	22335	2	Cbl	CG7037	22335	0.051	WT	WT	0.79	0.01	1.283	0.097			0
COL4A3BP	10087	5	74666927	74807805	140878	left	29	2				cert	CG7207	103563	2	cert	CG7207	103563	5.9e-06	WT	fatter	0.85	0.01	1.89	0.111			0
KCTD13	253980	16	29917656	29937544	19888	left	70	2				CG10465	CG10465	107131	2	CG10465	CG10465	107131	0.0022	WT	fatter	0.8	0.03	2.241	0.26			0
CLUAP1	23059	16	3550944	3589047	38103	left	64	2				CG17599	CG17599	14683	2	CG17599	CG17599	14683	0.00017	WT	fatter	0.78	0.02	2.201	0.158			0
LSM4	25804	19	18417039	18434000	16961	left	82	2				CG17768	CG17768	49674	2	CG17768	CG17768	49674	0.0018	WT	WT	0.8	0.01	0.991	0.173			0
FAM57B	83723	16	30035747	30064337	28590	right	70	3				CG17841	CG17841	103772	2	CG17841	CG17841	103772	0.0012	WT	WT	0.81	0.01	0.891	0.207			0
C10orf32	119032	10	104613966	104624717	10751	left	47	2				CG18065	CG18065	15361	3	CG18065	CG18065	15361	0.00022	WT	leaner	0.8	0.01	0.963	0.263			0
RAPSN	5913	11	47459307	47470729	11422	left	53	2				CG1909	CG1909	20745	3	CG1909	CG1909	20745	2.4e-08	WT	WT	0.77	0.01	1.778	0.338			1
TMEM18	129787	2	667792	677438	9646	target	10	1	rs2867125	622827	45 kb 3' away	CG30051	CG30051	106840	2	CG30051	CG30051	106840	2.4e-22	WT	WT	0.85	0.01	2.143	0.31			0
ANKRD29	147463	18	21179976	21242848	62872	right	77	3				CG3104	CG3104	21289	2	CG3104	CG3104	21289	0.0094	WT	WT	0.75	0.01	1.135	0.176			0
NDUFB8	4714	10	102283496	102289639	6143	left	46	2				CG3192	CG3192	108745	2	CG3192	CG3192	108745	0.37	WT	WT	0.85	0.01	1.232	0.2			1
PGPEP1	54858	19	18451396	18480762	29366	target	82	1	rs17724992	18315825	intron	CG32147	CG32147	34419	2	CG32147	CG32147	34419	0.0045	WT	WT	0.75	0.01	1.419	0.243			1
NT5C2	22978	10	104847773	104953062	105289	target	47	1	rs11191560	104859028	intron	CG32549	CG32549	103916	2	CG32549	CG32549	103916	2.2e-05	WT	leaner	0.82	0.01	0.312	0.099			0
PRPF40B	25766	12	50017196	50038451	21255	left	55	2				CG3542	CG3542	26229	3	CG3542	CG3542	26229	0.16	WT	fatter	0.76	0.01	1.601	0.085			1
RABEP1	9135	17	5185557	5289131	103574	target	75	1	rs1000940	5223976	intron	CG4030	CG4030	110346	2	CG4030	CG4030	110346	1.8e-05	WT	WT	0.85	0.01	1.355	0.094			0
ZCCHC8	55596	12	122956145	122985542	29397	right	56	3				CG4622	CG4622	106312	2	CG4622	CG4622	106312	0.00081	WT	fatter	0.82	0.01	2.33	0.22			1
SBK1	388228	16	28270040	28335169	65129	target	68	1	rs2650492	28240912	3'-UTR	CG4945	CG4945	24683	2	CG4945	CG4945	24683	0.00025	WT	fatter	0.76	0.01	2.105	0.153			0
RALGPS1	9649	9	129677052	129985444	308392	right	44	3				CG5522	CG5522	40596	3	CG5522	CG5522	40596	0.00051	WT	leaner	0.76	0.01	0.771	0.133			0
MVB12B	89853	9	129089122	129269319	180197	left	44	2				CG7192	CG7192	52526	2	CG7192	CG7192	52526	0.0067	WT	WT	0.74	0.03	1.09	0.049			0
SLC39A13	91252	11	47428682	47438050	9368	left	53	2				CG7816	CG7816	1362	2	CG7816	CG7816	1362	8e-08	WT	fatter	0.76	0.02	1.669	0.175			0
USP6	9098	17	5031686	5078326	46640	left	75	2				CG8334	CG8334	18982	3	CG8334	CG8334	18982	0.03	WT	WT	0.8	0.01	1.204	0.156			0
USP33	23032	1	78161671	78225563	63892	left	6	2				CG8494	CG8494	110250	2	CG8494	CG8494	110250	0.041	WT	WT	0.86	0.02	1.188	0.1			1
CLIP1	6249	12	122755980	122907178	151198	target	56	1	rs11057405	121347850	intron	CLIP-190	CG5020	107176	2	CLIP-190	CG5020	107176	0.00053	WT	fatter	0.82	0.01	2.303	0.136			0
CLN3	1201	16	28488599	28505896	17297	right	68	3				cln3	CG5582	5322	2	cln3	CG5582	5322	2.1e-07	WT	WT	0.76	0.01	1.36	0.322			0
CREB1	1385	2	208394615	208470283	75668	right	17	3				CrebB-17A	CG6103	101512	2	CrebB-17A	CG6103	101512	8.7e-06	WT	WT	0.8	0.02	1.153	0.207			0
AQP2	359	12	50344523	50352663	8140	right	55	3				Drip	CG9023	106911	2	Drip	CG9023	106911	0.11	WT	WT	0.81	0.01	1.5	0.068			0
AQP5	362	12	50355278	50359464	4186	right	55	3								Drip	CG9023	106911	0.29	WT	WT	0.81	0.01	1.5	0.068			1
SCARB2	950	4	77079889	77135051	55162	target	26	1	rs17001654	77348592	intron	emp	CG2727	12233	3	emp	CG2727	12233	0.00022	WT	fatter	0.78	0.01	1.688	0.202			1
FOXO3	2309	6	108881025	109005971	124946	target	33	1	rs9400239	109084356	intron	foxo	CG3143	106097	2	foxo	CG3143	106097	0.0014	WT	fatter	0.82	0.01	2.224	0.129			0
STK36	27148	2	219536748	219567439	30691	right	19	3				fu	CG6551	27662	3	fu	CG6551	27662	0.0025	WT	WT	0.77	0.02	1.302	0.118			0
VIL1	7429	2	219283837	219314247	30410	left	19	2				Gel	CG1106	37837	2	Gel	CG1106	*37867	0.00013	WT	WT	1.5	0.02	1.669	0.125			0
ZNF704	619279	8	81540685	81787015	246330	right	39	3			2 kb away	Glut4EF	CG34360	35664	2	Glut4EF	CG34360	35664	0.01	WT	leaner	0.76	0.01	0.275	0.06			1
HIP1	3092	7	75162618	75368289	205671	target	36	1	rs1167827	75001105	3' UTR	Hip1	CG10971	106978	2	Hip1	CG10971	106978	2.1e-06	WT	WT	0.82	0.01	1.303	0.131			1
TAL1	6886	1	47681961	47697937	15976	target	1	1	rs977747	47457264	3'UTR	HLH3B	CG2655	104381	2	HLH3B	CG2655	104381	5.9e-05	WT	leaner	0.81	0.01	0.367	0.05			0
ISYNA1	51477	19	18545197	18549110	3913	right	82	3				Inos	CG11143	100763	2	Inos	CG11143	100763	0.24	WT	WT	0.83	0.01	1.252	0.071			0
JUND	3727	19	18390562	18392431	1869	left	82	2				Jra	CG2275	107997	2	Jra	CG2275	107997	0.043	WT	WT	0.82	0.01	1.555	0.071			0
SLC11A1	6556	2	219246751	219261616	14865	left	19	2				Mvl	CG3671	109434	2	Mvl	CG3671	109434	0.0066	WT	WT	0.81	0.01	1.555	0.117			0
NAA60	79903	16	3493610	3536962	43352	left	64	2				Naa60	CG18177	101408	2	Naa60	CG18177	101408	0.033	WT	WT	0.83	0.01	1.397	0.13			0
AGBL2	79841	11	47681142	47736927	55785	right	53	3				NnaD	CG44533	110603	2	NnaD	CG44533	110603	3.4e-10	WT	fatter	0.82	0.02	2.083	0.245			0
OTX1	5013	2	63277191	63284965	7774	right	15	3				oc	CG12154	51480	2	oc	CG12154	51480	0.0057	WT	fatter	0.75	0.02	2.7	0.17			0
SNAPC3	6619	9	15422693	15466746	44053	left	41	2				Pbp49	CG42515	105079	2	Pbp49	CG42515	105079	0.0086	WT	WT	0.81	0.01	1.486	0.175			1
FUBP1	8880	1	78409739	78444838	35099	target	6	1	rs12401738	78219349	yes	Psi	CG8912	105135	2	Psi	CG8912	105135	3e-05	WT	fatter	0.82	0.01	2.194	0.205			0
MAPK3	5595	16	30125425	30134629	9204	right	70	3				rl	CG12559	43123	2	rl	CG12559	43123	0.0022	WT	WT	0.78	0.01	1.129	0.305			0
RNF7	9616	3	141457050	141465644	8594	right	24	3				Roc2	CG8998	100629	2	Roc2	CG8998	100629	0.14	WT	WT	0.83	0.01	1.425	0.121			0
KNTC1	9735	12	123011795	123110946	99151	right	56	3				rod	CG1569	19152	3	rod	CG1569	19152	0.0013	WT	WT	0.78	0.03	1.102	0.244			0
SETD1A	9739	16	30968614	30995984	27370	left	71	2				Set1	CG40351	40683	2	Set1	CG40351	40683	0.035	WT	fatter	0.78	0.01	2.046	0.214			0
SHROOM3	57619	4	77356252	77704405	348153	right	26	3				Shroom	CG34379	107966	2	Shroom	CG34379	107966	0.031	WT	WT	0.82	0.02	1.235	0.162			1
ZC3H4	23211	19	47567443	47617008	49565	target	86	1	rs3810291	47569003	3'-UTR	su(s)	CG10128	10853	2	su(s)	CG6222	*10853	1e-07	WT	fatter	1.41	0.03	2.499	0.518			0
LMOD1	25802	1	201865583	201915715	50132	right	9	3				tmod	CG1539	108389	2	tmod	CG1539	108389	2.7e-05	WT	WT	0.81	0.01	1.214	0.109			0
TRA2B	6434	3	185632355	185655923	23568	left	25	2				tra2	CG10128	100805	2	tra2	CG10128	100805	0.074	WT	WT	0.833	0.01	1.657	0.173			0
RACGAP1	29127	12	50382944	50425585	42641	right	55	3				tum	CG13345	106850	2	tum	CG13345	106850	0.1	WT	fatter	0.82	0.02	2.652	0.407			0
LIN7C	55327	11	27515964	27528325	12361	left	50	2				veli	CG7662	110556	2	veli	CG7662	110556	2.7e-06	WT	WT	0.86	0.01	1.792	0.189			0
CYP4Z1	199974	1	47533159	47583991	50832	left	1	2											0.27									0
LINC00853	100874253	1	47644921	47646010	1089	left	1	2											0.014									0
PDZK1IP1	10158	1	47649260	47655770	6510	left	1	2											0.0017									0
FOXD2-AS1	84793	1	47897804	47900312	2508	right	1	3											0.33									0
FOXE3	2301	1	47881743	47883723	1980	right	1	3											0.06									0
STIL	6491	1	47715810	47779818	64008	right	1	3											7.1e-05									1
FPGT-TNNI3K	100526835	1	74663895	75010115	346220	target	5	1	rs1514175	74991644									1.4e-09									0
C1orf173	127254	1	75033794	75139421	105627	right	5	3											0.00011									0
CRYZ	1429	1	75171169	75199091	27922	right	5	3											0.013									0
TNNI3K	51086	1	74701070	75010115	309045	right	5	3																				0
TYW3	127253	1	75198835	75232360	33525	right	5	3											0.025									0
NEXN	91624	1	78354199	78412008	57809	left	6	2											0.0017									0
NEXN-AS1	374987	1	78347032	78357448	10416	left	6	2											3.8e-05									0
MGC27382	149047	1	78695282	78835148	139866	right	6	3											0.0014									0
LOC730102	730102	1	177975270	178007141	31871	right	8	3											0.0027									0
RASAL2	9462	1	178062863	178448648	385785	right	8	3											0.031									0
RASAL2-AS1	100302401	1	178060642	178063127	2485	right	8	3											0.18									0
MIR1231	100302158	1	201777738	201777829	91	left	9	2											0.0011									0
MIR5191	100847050	1	201688635	201688754	119	left	9	2											0.42									0
ELF3	1999	1	201979646	201986315	6669	right	9	3											0.034									0
RNPEP	6051	1	201951765	201975274	23509	right	9	3											0.27									0
SHISA4	149345	1	201857796	201861714	3918	right	9	3											3.3e-05									0
LOC100996637	100996637	2	495264	496630	1366	left	10	2											5.8e-08									0
LOC727944	727944	2	490770	492686	1916	left	10	2											0.0007									0
C2orf70	339778	2	26785426	26802394	16968	left	12	2											0.28									0
CIB4	130106	2	26804072	26864210	60138	left	12	2											0.13									0
CENPA	1058	2	27008856	27023934	15078	right	12	3											0.019									1
FLJ30838	400955	2	58747888	59290901	543013	target	14	1	rs887912	59302877									2.7e-06									1
MIR1302-4	100302130	2	208133998	208134147	149	target	17	1	rs17203016	208255518	120 kb away								7.2e-06									0
METTL21A	151194	2	208473838	208490651	16813	right	17	3											0.17									1
USP37	57695	2	219314973	219433083	118110	target	19	1	rs492400	219057996	intron								0.0003									0
GPBAR1	151306	2	219125737	219128581	2844	left	19	2											0.13									0
PNKD	25953	2	219135114	219211515	76401	left	19	2											0.01									0
PLCD4	84812	2	219472487	219501908	29421	right	19	3											0.002									0
ZNF142	7701	2	219502638	219524354	21716	right	19	3											0.0016									1
LOC100505947	100505947	3	25424592	25426418	1826	target	20	1	rs6804842	25106437									1.5e-05									0
RARB	5915	3	25215637	25639422	423785	right	20	3											9.1e-05									1
CADM2	253559	3	85008132	86123578	1115446	target	23	1	rs13078807	85884150									9.8e-08									0
ZBTB38	253461	3	141043054	141168633	125579	left	24	2											1.7e-06									0
GRK7	131890	3	141497042	141535891	38849	right	24	3											0.078									0
LOC646730	646730	3	141381933	141426233	44300	right	24	3											0.0016									1
ETV5	2119	3	185764105	185826900	62795	target	25	1	rs9816226	185834499	8 kb away								7.6e-14									0
LOC344887	344887	3	185677757	185698665	20908	left	25	2											0.0012									0
ART3	419	4	76932332	77033954	101622	left	26	2											0.0013									0
CXCL11	6373	4	76954834	76957349	2515	left	26	2																				0
CXCL9	4283	4	76922622	76928640	6018	left	26	2											0.34									0
CCDC158	339965	4	77234191	77333284	99093	right	26	3											0.068									0
FAM47E	100129583	4	77135192	77204935	69743	right	26	3											0.038									0
FAM47E-STBD1	100631383	4	77172852	77232282	59430	right	26	3											0.018									1
HHIP	64399	4	145567147	145662541	95394	target	28	1	rs11727676	145878514									0.0031									0
HHIP-AS1	646576	4	145564067	145567589	3522	left	28	2											0.0026									1
POC5	134359	5	74970022	75013312	43290	target	29	1	rs2112347	75015242	2 kb 5' away								4.8e-08									0
ANKDD1B	728780	5	74907300	74967670	60370	left	29	2											1.3e-06									0
POLK	51426	5	74807656	74895645	87989	left	29	2											1.4e-05									0
RPS10-NUDT3	100529239	6	34254970	34393901	138931	left	31	2											0.0039									1
TDRG1	732253	6	40346162	40347630	1468	target	32	1	rs2033529	40456631									5.8e-05									0
LRFN2	57497	6	40359372	40555125	195753	right	32	3											8.8e-05									0
LINC00222	387111	6	109072856	109091144	18288	right	33	3											0.046									1
IFNGR1	3459	6	137518620	137540980	22360	target	34	1	rs13201877	137717234									0.00023									0
IL22RA2	116379	6	137464956	137494784	29828	left	34	2											0.053									0
OLIG3	167826	6	137813335	137815530	2195	right	34	3											0.01									0
LOC541473	541473	7	75021222	75024734	3512	left	36	2																				0
NSUN5P1	155400	7	75039604	75046070	6466	left	36	2											0.18									0
PMS2L2	5380	7	74973158	74988250	15092	left	36	2																				0
PMS2P3	5387	7	75137068	75157452	20384	left	36	2											0.033									0
POM121C	100101267	7	75046059	75115564	69505	left	36	2											1.1e-05									0
SPDYE5	442590	7	74695027	75133627	438600	left	36	2											0.17									0
STAG3L1	54441	7	74988446	74997084	8638	left	36	2																				0
TRIM73	375593	7	75021233	75034895	13662	left	36	2																				0
CCL26	10344	7	75398841	75419063	20222	right	36	3											0.023									0
MIR4652	100616206	7	93346239	93346316	77	right	37	3											0.015									1
ASB4	51666	7	95115212	95169542	54330	target	38	1	rs6465468	95007450	3' UTR								6.7e-05									0
PON1	5444	7	94927668	94953883	26215	left	38	2											0.01									0
PON2	5445	7	95034173	95064635	30462	left	38	2											0.086									0
PON3	5446	7	94989180	95025701	36521	left	38	2											0.12									1
ZBTB10	65986	8	81397853	81438499	40646	target	39	1	rs16907751	81538012									1.5e-05									0
MIR5708	100847056	8	81153623	81153707	84	left	39	2											0.23									1
CCDC171	203238	9	15552871	15971896	419025	target	41	1	rs4740619	15634326	intron								0.00019									1
LINGO2	158038	9	27948083	29212997	1264914	target	42	1	rs10968576	28414339									1.9e-08									1
TLR4	7099	9	120466452	120479768	13316	target	43	1	rs1928295	119418304									0.00014									0
ASTN2	23245	9	119187503	120177316	989813	left	43	2											0.0061									0
ZBTB34	403341	9	129622943	129648156	25213	right	44	3											0.0092									0
ZBTB43	23099	9	129567284	129600488	33204	right	44	3											0.069									1
GRID1	2894	10	87359311	88126249	766938	target	45	1	rs7899106	87400884									0.00019									0
GRID1-AS1	100507470	10	87337487	87366971	29484	left	45	2											0.001									1
HIF1AN	55662	10	102295640	102313680	18040	target	46	1	rs17094222	102385430	86 kb 3' away								7e-05									0
LINC00263	90271	10	102133332	102148110	14778	left	46	2											0.26									0
WNT8B	7479	10	102222811	102243398	20587	left	46	2											0.19									0
AS3MT	57412	10	104629182	104661655	32473	left	47	2											2.8e-05									0
INA	9118	10	105036918	105050107	13189	right	47	3											0.14									0
PCGF6	84108	10	105062552	105110890	48338	right	47	3											0.025									1
TRIM66	9866	11	8633583	8704204	70621	target	49	1	rs4256980	8630515	intron								1.9e-07									0
STK33	65975	11	8413416	8615835	202419	left	49	2											7.6e-08									0
ST5	6764	11	8714898	8932497	217599	right	49	3											0.029									1
BDNF	627	11	27676439	27743604	67165	target	50	1	rs10767664	27725986									5.5e-13									0
BDNF-AS	497258	11	27528383	27719717	191334	left	50	2			intron								1.4e-12									0
ACCS	84680	11	44087728	44105790	18062	right	52	3											0.048									0
ACCSL	390110	11	44069530	44081526	11996	right	52	3											0.012									0
ALKBH3	221120	11	43902356	43941824	39468	right	52	3											0.041									0
C11orf96	387763	11	43964105	43965432	1327	right	52	3											0.074									0
C1QTNF4	114900	11	47611215	47615960	4745	left	53	2											1.3e-09									0
FAM180B	399888	11	47608229	47610745	2516	left	53	2											1.5e-09									0
KBTBD4	55709	11	47593748	47600566	6818	left	53	2											6e-08									0
MIR4487	100616222	11	47422520	47422592	72	left	53	2											4.9e-05									0
FNBP4	23360	11	47738054	47789011	50957	right	53	3											2.8e-10									1
CADM1	23705	11	115039932	115375240	335308	target	54	1	rs12286929	114527614									1.7e-05									0
BCDIN3D-AS1	100286844	12	50222325	50234936	12611	left	55	2											2.8e-10									0
FAM186B	84070	12	49976657	49999432	22775	left	55	2											0.065									0
NCKAP5L	57701	12	50184928	50222207	37279	left	55	2											4.1e-09									0
AQP6	363	12	50360873	50370921	10048	right	55	3											0.12									0
ASIC1	41	12	50451419	50477404	25985	right	55	3											0.099									0
FAIM2	23017	12	50260678	50297759	37081	right	55	3											1.4e-09									0
B3GNT4	79369	12	122688227	122692676	4449	left	56	2											0.46									0
DIABLO	56616	12	122692208	122712080	19872	left	56	2											0.012									0
IL31	386653	12	122656576	122658745	2169	left	56	2											0.79									0
LRRC43	254050	12	122652265	122688017	35752	left	56	2											0.00058									1
LINC00558	100861552	13	54389553	54450253	60700	target	57	1	rs12429545	54102206	160 kb away								2.5e-06									1
STXBP6	29091	14	25278859	25519094	240235	target	59	1	rs10132280	24998019									0.00014									0
CYP19A1	1588	15	51500253	51630794	130541	left	61	2											0.012									0
SCG3	29106	15	51973549	52013222	39673	right	61	3											3.8e-06									1
MAP2K5	5607	15	67835020	68099454	264434	target	62	1	rs2241423	68086838	intron								1.2e-10									0
RNU6-1	26827	15	68132277	68132382	105	right	62	3											3.4e-10									1
ADPGK-AS1	100287559	15	73075175	73090539	15364	target	63	1	rs7164727	73093991	3 kb away								0.0005									0
GOLGA6B	55889	15	72947037	72959737	12700	left	63	2											0.93									0
LOC646670	646670	15	72921106	72932538	11432	left	63	2											0.12									0
MIR630	693215	15	72879557	72879653	96	left	63	2											0.29									1
NLRC3	197358	16	3589032	3627391	38359	target	64	1	rs758747	3567359	5'-UTR								2.6e-05									0
C16orf90	646174	16	3543483	3545757	2274	left	64	2											0.45									0
MTRNR2L4	100463285	16	3421052	3422282	1230	left	64	2											0.52									0
OR2C1	4993	16	3405888	3406923	1035	left	64	2											0.14									0
ZNF174	7727	16	3451189	3459363	8174	left	64	2											0.47									0
ZSCAN32	54925	16	3431660	3451064	19404	left	64	2											0.38									0
DNASE1	1773	16	3661771	3712688	50917	right	64	3											0.00043									0
SLX4	84464	16	3631181	3661584	30403	right	64	3											5.9e-05									0
IQCK	124152	16	19727777	19869086	141309	left	66	2											8.1e-09									0
KNOP1	400506	16	19717672	19729725	12053	left	66	2											3.2e-06									1
UMOD	7369	16	20344372	20364199	19827	target	67	1	rs11074446	20255123	34 kb away								0.00055									0
GPR139	124274	16	20042980	20085099	42119	left	67	2											3.2e-08									0
ACSM2A	123876	16	20462845	20498990	36145	right	67	3											0.067									0
ACSM5	54988	16	20420849	20452289	31440	right	67	3											0.052									0
APOBR	55911	16	28505969	28510290	4321	right	68	3											9.8e-05									0
IL27	246778	16	28510682	28518154	7472	right	68	3											0.023									0
EIF3C	8663	16	28699878	28747050	47172	left	69	2																				0
MIR4721	100616256	16	28855239	28855327	88	left	69	2											3.2e-10									0
CD19	930	16	28943081	28950667	7586	right	69	3											5.1e-05									0
LAT	27040	16	28996146	29002103	5957	right	69	3											1.6e-06									0
MIR4517	100616487	16	28969903	28969981	78	right	69	3											5.4e-07									0
NFATC2IP	84901	16	28962317	28977785	15468	right	69	3											5.2e-07									0
RABEP2	79874	16	28915741	28937338	21597	right	69	3											3.5e-09									0
RRN3P2	653390	16	29086162	29128038	41876	right	69	3											0.033									0
HIRIP3	8479	16	30003641	30007416	3775	left	70	2											0.0059									0
KIF22	3835	16	29801382	29816705	15323	left	70	2											0.92									0
LOC100289283	100289283	16	29819999	29823300	3301	left	70	2											0.9									0
MAZ	4150	16	29817416	29822503	5087	left	70	2																				0
MVP	9961	16	29831714	29859359	27645	left	70	2											0.16									0
PRRT2	112476	16	29823408	29827201	3793	left	70	2																				0
SEZ6L2	26470	16	29882479	29910584	28105	left	70	2											0.024									0
TMEM219	124446	16	29973350	29984372	11022	left	70	2											0.0032									0
ZG16	653808	16	29789560	29792968	3408	left	70	2											0.087									0
C16orf92	146378	16	30034654	30036022	1368	right	70	3											0.0021									0
GDPD3	79153	16	30115976	30125263	9287	right	70	3											0.0043									0
LOC613037	613037	16	30234349	30256931	22582	right	70	3																				0
LOC613038	613038	16	30215636	30218247	2611	right	70	3																				0
SLX1A-SULT1A3	100526830	16	30205753	30215649	9896	right	70	3																				0
BCKDK	10295	16	31119614	31124111	4497	left	71	2											0.011									0
CTF1	1489	16	30907927	30914880	6953	left	71	2											0.036									0
FBXL19	54620	16	30934391	30960103	25712	left	71	2											0.12									0
FBXL19-AS1	283932	16	30930639	30934589	3950	left	71	2											0.12									0
MIR4519	100616231	16	30886586	30886643	57	left	71	2											0.17									0
PRSS53	339105	16	31094744	31100288	5544	left	71	2											0.027									0
STX4	6810	16	31044415	31051488	7073	left	71	2											0.012									0
ZNF646	9726	16	31085580	31094832	9252	left	71	2											0.012									0
ZNF668	79759	16	31072163	31085640	13477	left	71	2											0.0099									0
C16orf98	100652740	16	31213205	31214772	1567	right	71	3											0.2									0
ITGAM	3684	16	31271287	31344212	72925	right	71	3											0.0046									0
ITGAX	3687	16	31366487	31394319	27832	right	71	3											0.013									0
PRSS36	146547	16	31150243	31161414	11171	right	71	3											0.15									0
PRSS8	5652	16	31142753	31147150	4397	right	71	3											0.0086									0
PYCARD	29108	16	31212806	31214096	1290	right	71	3																				0
PYDC1	260434	16	31227282	31228397	1115	right	71	3											0.17									0
TRIM72	493829	16	31225341	31236509	11168	right	71	3											0.19									1
CBLN1	869	16	49311827	49315741	3914	target	72	1	rs2080454	47620091									0.00056									1
FTO	79068	16	53737874	54148378	410504	target	73	1	rs1558902	53803574									2e-62									0
RPGRIP1L	23322	16	53633817	53737770	103953	left	73	2											6e-05									0
HIC1	3090	17	1957453	1962980	5527	left	74	2											0.075									0
MIR132	406921	17	1953201	1953301	100	left	74	2											0.66									0
MIR212	406994	17	1953564	1953673	109	left	74	2																				0
RTN4RL1	146760	17	1837970	1928177	90207	left	74	2											0.00087									0
SNORD91A	692207	17	2233572	2233663	91	right	74	3											0.36									0
SNORD91B	692208	17	2232418	2232503	85	right	74	3																				0
SCIMP	388325	17	5112214	5138996	26782	left	75	2											0.1									0
ZNF594	84622	17	5082829	5095177	12348	left	75	2											0.02									0
LOC728392	728392	17	5402746	5405041	2295	right	75	3											9.3e-05									0
MIS12	79003	17	5389693	5394133	4440	right	75	3											7.3e-05									0
NLRP1	22861	17	5404718	5487831	83113	right	75	3											0.00084									0
TMEM241	85019	18	20875976	21017924	141948	left	77	2											0.019									1
GRP	2922	18	56887399	56898002	10603	target	78	1	rs7243357	55034299	4 kb away								0.0065									1
MC4R	4160	18	58038563	58040000	1437	target	81	1	rs571312	57839769									1.8e-22									0
KIAA1683	80726	19	18367905	18385318	17413	left	82	2											0.0084									0
LOC729966	729966	19	18360759	18366228	5469	left	82	2											0.0035									0
C19orf60	55049	19	18699494	18703146	3652	right	82	3											0.61									0
CRLF1	9244	19	18704034	18717659	13625	right	82	3											0.2									0
GDF15	9518	19	18496967	18499985	3018	right	82	3											0.029									0
LRRC25	126364	19	18501946	18508427	6481	right	82	3											0.021									0
BCAM	4059	19	45312315	45324677	12362	left	84	2											0.094									0
BCL3	602	19	45246069	45263300	17231	left	84	2											0.083									0
CEACAM16	388551	19	45202420	45213985	11565	left	84	2											0.11									0
CEACAM19	56971	19	45174723	45187630	12907	left	84	2											0.32									0
MIR4531	100616355	19	45156955	45157001	46	left	84	2																				0
PVR	5817	19	45147097	45169428	22331	left	84	2											0.31									0
PVRL2	5819	19	45349392	45392484	43092	left	84	2											0.023									0
APOC1	341	19	45417576	45422605	5029	right	84	3											0.25									0
APOC1P1	342	19	45430059	45434642	4583	right	84	3											0.017									0
APOC2	344	19	45449238	45452821	3583	right	84	3											0.14									0
APOC4	346	19	45445494	45448752	3258	right	84	3											0.17									0
APOE	348	19	45409038	45412649	3611	right	84	3											0.19									0
CLASRP	11129	19	45542297	45574213	31916	right	84	3				CG6695	CG6695	107965	2				0.15									0
GEMIN7	79760	19	45579023	45594781	15758	right	84	3											0.016									0
GIPR	2696	19	46171489	46185716	14227	left	85	2											8.5e-07									0
GPR4	2828	19	46093021	46105465	12444	left	85	2											0.3									0
PPM1N	147699	19	46001730	46005767	4037	left	85	2											0.28									0
FBXO46	23403	19	46213886	46234150	20264	right	85	3											0.057									0
FOXA3	3171	19	46367517	46377054	9537	right	85	3											0.055									0
LOC388553	388553	19	46236514	46267375	30861	right	85	3											0.41									0
MYPOP	339344	19	46393280	46405861	12581	right	85	3											0.15									0
SNAR-E	100170220	19	47333841	47333960	119	left	86	2											0.098									0
TMEM160	54958	19	47549166	47551881	2715	left	86	2											0.063									0
BBC3	27113	19	47724078	47736022	11944	right	86	3											0.0038									0
C5AR1	728	19	47813103	47825326	12223	right	86	3											0.16									0
CCDC9	26093	19	47759730	47777328	17598	right	86	3											0.027									0
PRR24	255783	19	47777658	47778979	1321	right	86	3											0.031									1
FLJ45139	400867	21	25719191	25743965	24774	target	87	1	rs2836754	40291740	intron								0.0041									0
LINC00114	400866	21	40110878	40145400	34522	left	87	2											0.048									0
PSMG1	8624	21	40449075	40555439	106364	right	87	3											0.0028									0
																		VDRC w1118 control				0.78	0.01					78
																		60100 control				0.83	0.01
																		VDRC w1118 female control				1.49	0.03
